# Supplementary material
Source: PubMed Central journal article supplement (PMC4277569)
Supplement: AEM.03117-14_zam999105963so1.pdf [file AEM.03117-14_zam999105963so1.pdf]

## Supplementary Results

**Metagenomic data reveal human skin-associated viruses, abundant enterophages, virulence genes, and *S. aureus*.** There were no significant differences in the relative abundances of functional or taxonomic hits based on gender, usage, or time point (Bonferroni-corrected Kruskal-Wallis,  $p > 0.2$ ). Eubacteria were the most abundant domain, followed by Eukaryota. Viruses and Archaea represented a minority of the community (**Fig. S4A**). Caudovirales (tailed bacteriophages), Herpesvirales (animal-associated), Picornavirales (eukaryote-associated), and Mononegavirales (eukaryote-associated) were the second, third, fourth, and fifth most abundant viral orders, respectively (**Fig. S4B**). However, the most abundant viral order was ‘unclassified’, and Microviridae was the most abundant family within this category (**Fig. S4C**).

## Supplemental Figures and Tables

| Pangenomes | Total size (Mbp) | No. of Contigs (>300bp) | %G+C | Avg. contig length (kbp) | Longest contig length (kbp) | No. of strains |
|------------|------------------|-------------------------|------|--------------------------|-----------------------------|----------------|
| SK1        | 2.98             | 777                     | 33.0 | 3.8                      | 115.8                       | 3              |
| SK2        | 1.90             | 844                     | 32.5 | 2.3                      | 16.8                        | 3              |
| SK3        | 2.67             | 1079                    | 32.8 | 2.5                      | 28.7                        | 3              |
| SK4        | 2.20             | 401                     | 32.2 | 5.6                      | 48.4                        | 1              |
| SK5        | 2.30             | 455                     | 33.8 | 5.0                      | 30.7                        | 1              |
| SK6        | 2.40             | 148                     | 32.5 | 16.3                     | 89.3                        | 1              |

**Table S1.** Summary of *Staphylococcus* pan-genome assemblies.

|                 |                                  | <b>Staphylococcus Population Genomes</b> |            |            |            |            |            |                       |
|-----------------|----------------------------------|------------------------------------------|------------|------------|------------|------------|------------|-----------------------|
|                 |                                  | <b>(% of total reads mapping)</b>        |            |            |            |            |            |                       |
| <b>Samples</b>  | <b>Total Reads<br/>(post-QC)</b> | <b>SK1</b>                               | <b>SK2</b> | <b>SK3</b> | <b>SK4</b> | <b>SK5</b> | <b>SK6</b> | <b>Other<br/>Taxa</b> |
| <b>4pmD1</b>    | 2768247                          | 3.9                                      | 0.23       | 0.95       | 81.2       | 0.15       | 0.54       | 12.4                  |
| <b>4pmD3</b>    | 4946633                          | 0.011                                    | 0.011      | 0.007      | 0.006      | 0.007      | 0.008      | 99.9                  |
| <b>6pmD1</b>    | 4137512                          | 0.165                                    | 0.034      | 0.34       | 0.58       | 38.5       | 0.33       | 60.0                  |
| <b>8pmD1</b>    | 6560322                          | 35.0                                     | 0.210      | 0.715      | 2.79       | 0.140      | 0.349      | 60.7                  |
| <b>8pmD3</b>    | 5035609                          | 0.503                                    | 60.6       | 0.342      | 0.172      | 0.138      | 0.378      | 37.8                  |
| <b>12pmD1</b>   | 3058876                          | 1.88                                     | 0.368      | 36.1       | 4.34       | 0.056      | 38.10      | 19.0                  |
| <b>12pmD3</b>   | 148282                           | 0.273                                    | 0.325      | 0.577      | 0.336      | 0.194      | 0.632      | 97.6                  |
| <b>An12pmD1</b> | 4045684                          | 0.361                                    | 0.608      | 38.9       | 2.65       | 0.016      | 41.46      | 15.99                 |

**Table S2.** Percent abundance of *Staphylococcus* pan-genomes across culture metagenome samples.

| <b>Metabolic systems</b>                           | <b>Sk1</b> | <b>Sk2</b> | <b>Sk3</b> | <b>Sk4</b> | <b>Sk5</b> | <b>Sk6</b> |
|----------------------------------------------------|------------|------------|------------|------------|------------|------------|
| Cofactors, Vitamins, Prosthetic Groups, Pigments   | 241        | 146        | 119        | 152        | 123        | 144        |
| Cell Wall and Capsule                              | 95         | 90         | 63         | 56         | 87         | 93         |
| Virulence, Disease and Defense                     | 112        | 78         | 61         | 71         | 53         | 68         |
| Potassium metabolism                               | 11         | 10         | 4          | 4          | 9          | 4          |
| Photosynthesis                                     | 0          | 0          | 0          | 0          | 0          | 0          |
| Miscellaneous                                      | 43         | 30         | 26         | 33         | 33         | 24         |
| Phages, Prophages, Transposable elements, Plasmids | 33         | 12         | 31         | 34         | 15         | 27         |
| Membrane Transport                                 | 79         | 58         | 57         | 49         | 32         | 52         |
| Iron acquisition and metabolism                    | 38         | 17         | 27         | 26         | 56         | 27         |
| RNA Metabolism                                     | 196        | 140        | 116        | 114        | 110        | 117        |
| Nucleosides and Nucleotides                        | 158        | 83         | 91         | 88         | 86         | 89         |
| Protein Metabolism                                 | 161        | 226        | 119        | 196        | 199        | 203        |
| Cell Division and Cell Cycle                       | 17         | 32         | 26         | 27         | 40         | 40         |
| Motility and Chemotaxis                            | 0          | 0          | 0          | 0          | 0          | 0          |
| Regulation and Cell signaling                      | 58         | 27         | 34         | 36         | 40         | 36         |
| Secondary Metabolism                               | 6          | 4          | 4          | 4          | 4          | 4          |
| DNA Metabolism                                     | 97         | 112        | 71         | 65         | 74         | 106        |
| Fatty Acids, Lipids, and Isoprenoids               | 124        | 92         | 83         | 92         | 67         | 86         |
| Nitrogen Metabolism                                | 28         | 23         | 26         | 23         | 11         | 21         |
| Dormancy and Sporulation                           | 22         | 10         | 4          | 10         | 10         | 10         |
| Respiration                                        | 53         | 44         | 29         | 30         | 25         | 30         |
| Stress Response                                    | 104        | 75         | 78         | 67         | 64         | 63         |
| Metabolism of Aromatic Compounds                   | 9          | 6          | 5          | 5          | 5          | 5          |
| Amino Acids and Derivatives                        | 345        | 321        | 317        | 309        | 248        | 305        |
| Sulfur Metabolism                                  | 27         | 14         | 22         | 18         | 19         | 19         |
| Phosphorus Metabolism                              | 40         | 32         | 27         | 25         | 23         | 25         |
| Carbohydrates                                      | 357        | 229        | 210        | 223        | 225        | 219        |

**Table S3.** Distribution of annotated protein-coding genes from culture metagenomes across SEED Subsystem categories, for each *Staphylococcus* pan-genome.

| Study      | # of Surfaces       | # of Time points/Day        | # of Days | # of Restrooms                                      | # of Stalls/ Restroom | Total Surface Samples | Data Generated                                                                                                   |
|------------|---------------------|-----------------------------|-----------|-----------------------------------------------------|-----------------------|-----------------------|------------------------------------------------------------------------------------------------------------------|
| Eight-Hour | 1 (surface1)        | 8 (one collection per hour) | 2         | 4 (male and female from high and low use restrooms) | 1                     | 64                    | Virus:Bacteria Microscopy, 16S sequencing                                                                        |
| One-Month  | 3 (surface 1,2 & 3) | 1                           | 15        | 4 (male and female from high and low use restrooms) | 1                     | 180                   | Virus:Bacteria Microscopy, 16S sequencing                                                                        |
| Eight-Week | 3 (surface 1,2 & 3) | 1                           | 8         | 2 (one male and one female)                         | 1                     | 48                    | Virus:Bacteria Microscopy, 16S sequencing                                                                        |
| Human-Free | 1 (surface1)        | 5 (12, 2, 4, 6 & 8pm)       | 1         | 2 (one male and one female)                         | 2                     | 20                    | Virus:Bacteria Microscopy, 16S sequencing, 16S sequencing post aerobic & post anaerobic culture, and metagenomes |

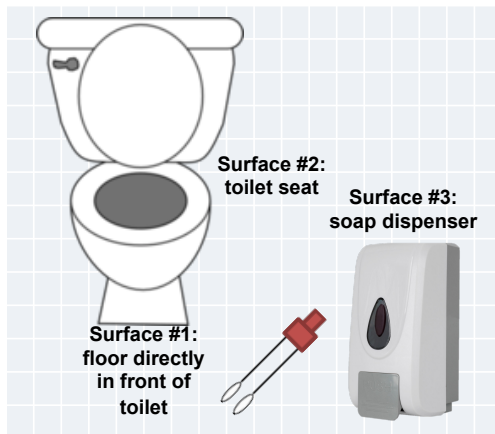

**Figure S1.** Sampling protocol for four restroom studies. The diagram shows the three surfaces sampled. Not all surfaces are sampled for each study as indicated in the table. The table includes the number of surfaces sampled, number of time points per day, number of sampling days, number of restrooms, and number of stalls per restroom for each study. Total number of surface samples collected is determined by multiplying all data in the corresponding row. Data originated from the corresponding surface samples after further processing as explained in the paper.

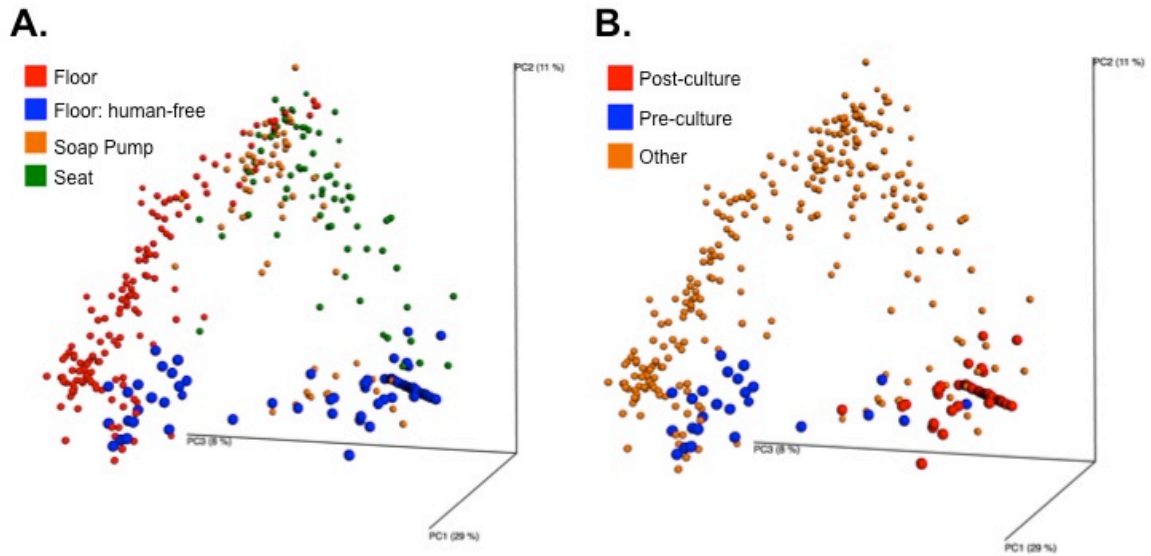

**Figure S2.** Principal coordinate plots (weighted UniFrac) showing samples from all four restroom studies along the first 3 axes. The enlarged spheres towards the bottom of the plots represent the samples from the human-free study. Panel A shows the samples colored by surface type (human-free samples indicated as ‘na’, but these samples were taken from the floor). Panel B shows samples colored by culture status (‘na’ denotes samples from all other studies except the human-free study; ‘Post-culture’ denotes swab samples that were sequenced after being cultured; ‘Pre-culture’ denotes swab samples that were sequenced prior to being cultured).

**A.**

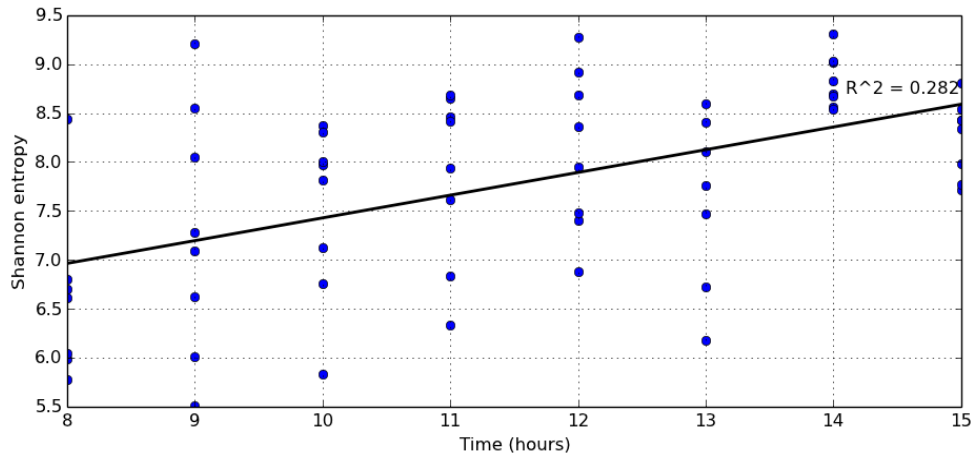

**B.**

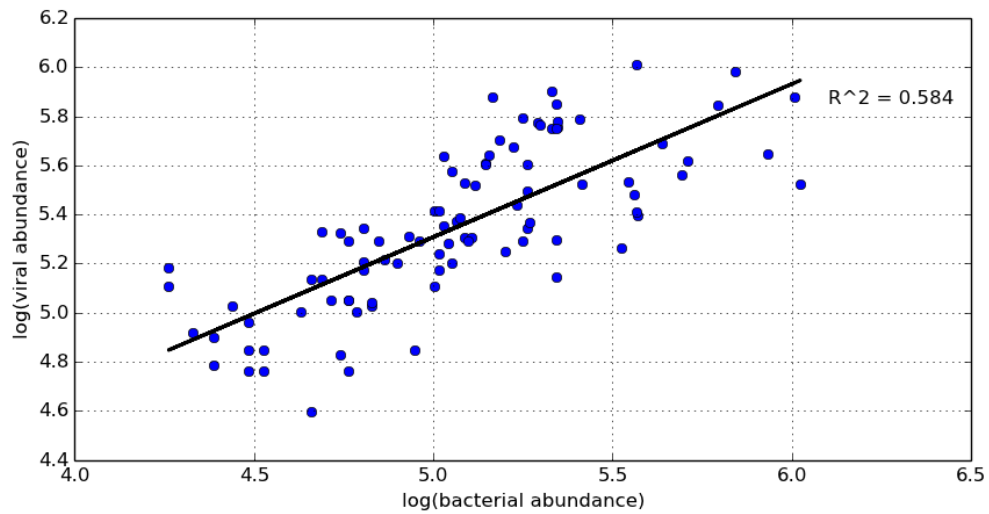

**Figure S3.** (A)  $\log_{10}$  viral and bacterial abundances are positively correlated ( $R^2 = 0.584$ ,  $p < 0.0001$ ). (B) Shannon diversity is positively correlated with time since decontamination ( $R^2 = 0.282$ ,  $p < 0.0001$ ).

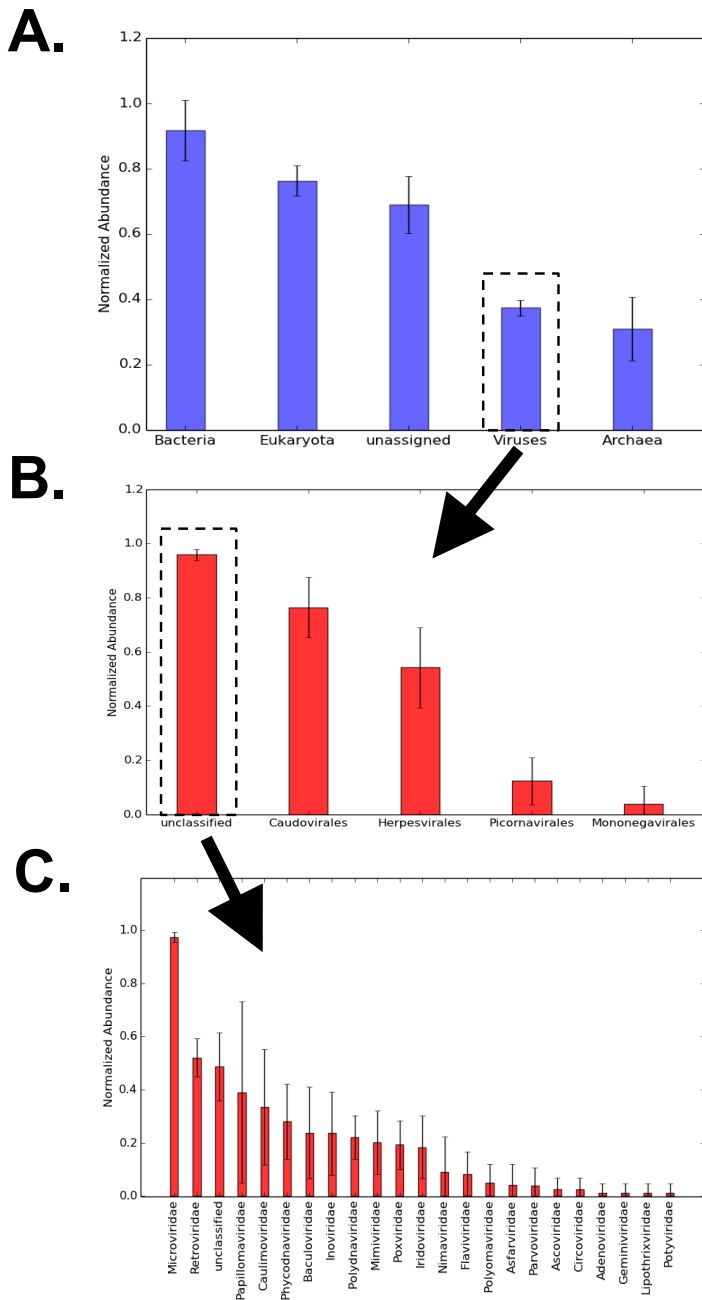

**Figure S4.** Normalized abundances of sequence reads annotated to hierarchical taxonomic categories (M5NR database) from the 7 floor metagenomes. Panel A shows domain-level abundances. B shows the prevalence of viral orders. C shows viral families within the ‘unclassified’ order. Dashed boxes show the categories that are expanded in the preceding panel.

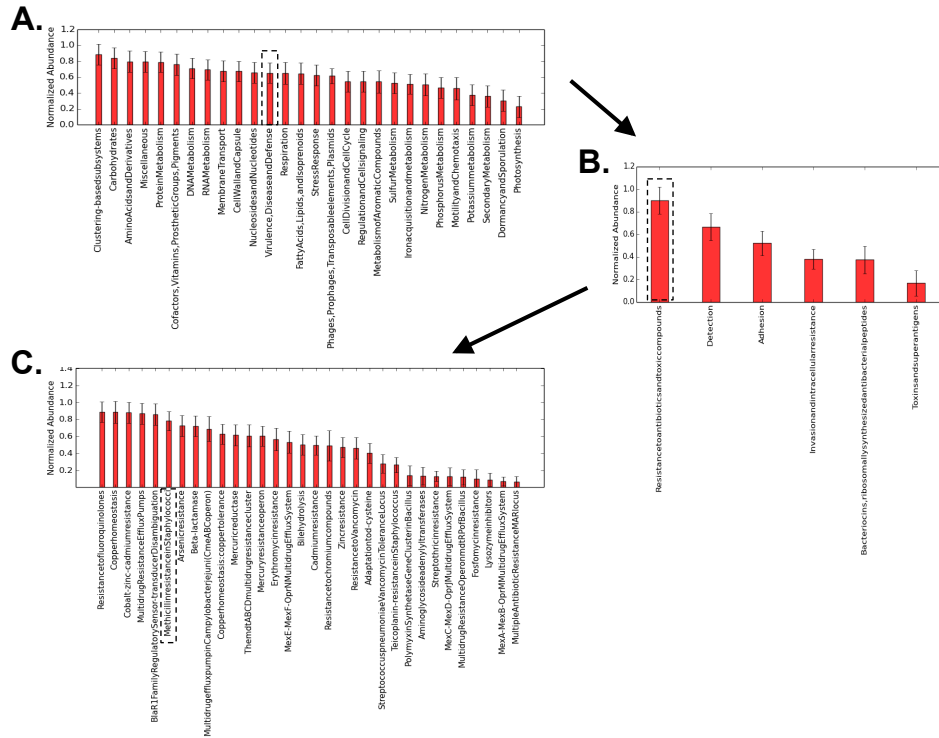

**Figure S5.** Normalized abundances of sequence reads annotated to hierarchical functional categories (SEED) from the 7 floor metagenomes. Panel A shows SEED L1 abundances. B shows the prevalence of virulence categories (SEED L2). C shows SEED L3 categories within the antibiotic resistance category from panel B. Dashed boxes show the categories that are expanded in the preceding panel.
